# Supplementary material for: Validation of three functional tests against the 6-minute walk test in individuals with obesity
Source: PeerJ. 2025 Jul 25;13:e19755. doi: 10.7717/peerj.19755 (PMC12302963; doi:10.7717/peerj.19755)
Supplement: Supplemental Information 1 [file peerj-13-19755-s001.xls]

## Sheet: Dataset
ID	Sex	Age	Smoking	Drinking	Underlying disease	HT	DM	Dyslipid	OA	CKD	OSA	CVD	Fattyliver	Arthritis	Thyroid	PA level	Weight	Height	BMI	Waist circumferences	BaselineSBP	BaselineDBP	BaselineHR	BaselineBorgDys	BaselineBorgLegfatigue	BaselineO2sat	Twominwalkdistance from 6MWT	SixMWD	HRafter6MWT	BorgDysafter6MWT	BorgLegafter6MWT	O2satafter6MWT	HRpre2MST	O2satpre2MST	2MSTsteps	HRafter2MST	BorgDysafter2MST	BorgLegafter2MST	O2satafter2MST	HRpre1STST	O2satpre1STST	1STSTsets	HRpost1STST	BorgDysafter1STST	BorgLegafter1STST	O2satafter1STsT	Triglyceride	Cholesterol	LDL
1	1	37	0	0	1	0	1	0	0	0	0	0	0	0	0	2	98	155	40.8	126	100	84	108	0	1	98	163	438.5	125	3	4	98	108	98	71.5	121	3	3	97	106	97	25	119	2	3	98	174	226	151
2	1	34	0	0	0	0	0	0	0	0	0	0	0	0	0	5	80	155	33.3	101	115	69	78	1	1	99	151	473.3	96	2	2	98	81	100	83	123	2	3	98	80	98	29	114	2	2	98	87	194	118
3	1	24	0	1	0	0	0	0	0	0	0	0	0	0	0	5	115	156	51.1	84	124	88	102	2	1	98	134	450.5	113	3	2	97	104	99	73.5	123	7	7	97	101	99	28	115	5	5	98	153	172	106
4	1	24	0	1	0	0	0	0	0	0	0	0	0	0	0	1	145	162	55.3	142	162	92	101	1	1	99	134.4	388.5	137	4	6	97	103	99	62.5	127	3	5	97	102	99	21	132	7	6	98	136	175	110
5	1	29	0	0	0	0	0	0	0	0	0	0	0	0	0	3	86.5	155	36	93	132	73	98	4	5	95	121	374	103	6	3	97	97	96	55	102	6	4	97	97	96	30	101	6	4	97	196	189	109
6	1	30	0	0	0	0	0	0	0	0	0	0	0	0	0	2	119	158	44.5	127	143	82	78	4	3	97	138	402.4	102	3	2	97	82	97	80	125	3	3	98	80	98	39	119	5	4	99	235	223	142
7	1	48	0	0	0	0	0	0	0	0	0	0	0	0	0	1	101	156	41.1	107	129	79	88	1	4	98	149.2	447.5	110	5	5	97	88	98	57.5	114	4	5	97	89	98	21	112	4	2	97	223	204	103
8	1	29	0	0	1	0	1	0	0	0	0	0	0	0	0	4	120	181	36.6	122	136	76	96	1	2	98	165.5	518.5	117	3	3	99	100	99	71	121	5	6	99	98	99	22	121	7	5	99	416	231	154
9	0	33	0	0	0	0	0	0	0	0	0	0	0	0	0	4	162	172	54.8	130	146	82	72	2	3	96	149	449	112	3	3	97	74	96	65	121	5	4	96	73	98	20	107	4	4	95	107	208	142
10	1	36	0	0	0	0	0	0	0	0	0	0	0	0	0	2	106	167	38.9	167	131	73	78	1	3	96	142	426.4	115	6	7	98	79	98	85	114	7	9	99	80	96	28	115	6	9	95	104	206	141
11	1	37	0	1	1	1	1	0	0	0	0	0	0	0	0	2	94	165	35.4	122	138	85	78	0	0	99	134.5	422.5	112	3	3	98	82	97	65.5	115	2	2	99	80	96	24	120	4	2	95	361	265	187
12	0	44	0	0	1	0	1	0	0	0	0	0	0	0	0	2	118	179	38.5	137	138	85	79	4	2	96	167.5	485.8	111	8	6	96	81	97	95	113	8	7	99	80	98	27	110	8	6	97	512	158	69
13	1	38	0	0	0	0	0	0	0	0	0	0	0	0	0	4	107	167	38.4	107	119	66	86	4	0	98	165.4	479	130	8	7	98	85	98	86	122	8	6	99	84	98	31	110	8	8	99	76	181	123
14	1	25	0	1	1	1	1	1	0	0	0	0	1	0	0	3	120	158	48.1	128	130	72	90	6	0	98	137	380.3	128	7	8	98	95	99	70	137	8	8	97	93	98	35	140	8	5	95	132	212	138
15	1	31	0	0	0	0	0	0	0	0	0	0	0	0	0	2	84	155	35.4	103	128	80	94	0	1	97	135	416	113	6	5	98	95	98	72	126	8	6	99	95	98	28	115	6	6	97	126	202	137
16	1	55	0	0	1	1	0	0	0	0	0	0	0	0	0	3	95	163	35.3	101	132	85	80	0	0	99	131.3	435.4	107	1	1	99	82	99	72	103	1	1	99	81	98	19	95	1	1	99	90	161	95
17	0	36	0	1	1	1	0	0	0	0	0	0	0	0	0	2	125	175	40.8	116	150	98	85	2	2	98	165.5	496.3	120	3	3	97	86	99	68.5	124	4	4	99	87	99	25	123	4	4	98	160	187	122
18	1	37	0	1	0	0	0	0	0	0	0	0	0	0	0	2	140	165	51.4	127	143	84	110	0	0	98	136.3	456	123	5	3	97	109	99	75	125	5	4	98	109	98	27	123	3	2	97	122	176	88
19	0	19	0	0	0	0	0	0	0	0	0	0	0	0	0	2	147	170	50.8	127	146	88	88	0	0	99	123.2	376.5	118	5	5	97	89	99	72.5	116	3	2	98	87	98	29	116	5	2	98	119	170	103
20	0	33	0	0	0	0	0	0	0	0	0	0	0	0	0	4	162	172	56.1	130	145	90	75	0	0	97	152.5	482.2	118	1	0	97	75	98	76	128	2	1	95	76	98	24	122	1	1	96	101	182	89
21	0	23	0	1	1	1	0	0	0	0	0	0	0	0	0	2	173	174	57.1	157	130	90	70	3	2	97	61.5	175.5	90	9	9	96	71	98	42	84	8	9	98	72	99	19	84	10	10	97	190	238	158
22	0	60	0	1	1	0	1	0	0	0	0	0	0	0	0	2	78	158	30.1	99	124	66	64	1	2	97	153.2	464.2	88	4	4	97	68	95	95	96	4	4	97	65	96	67	95	4	3	95	212	143	60
23	1	41	0	0	1	1	1	0	0	0	0	0	0	0	0	4	78	153	33.3	115	139	65	80	0	0	98	153.5	466.2	105	3	1	98	81	98	105	109	5	2	96	82	99	70	105	3	2	98	228	150	61
24	1	39	0	0	0	0	0	0	0	0	0	0	0	0	0	2	100	155	42.9	107	162	95	103	4	2	98	162.2	448.5	126	7	7	98	104	99	78	123	9	8	98	103	98	32	118	7	7	99	77	192	124
25	1	38	0	0	0	0	0	0	0	0	0	0	0	0	0	2	106	167	40.1	101	129	70	71	1	1	98	176.6	533.5	126	5	4	99	72	99	92.5	134	5	6	98	73	99	42	124	4	5	98	76	181	123
26	1	21	0	1	0	0	0	0	0	0	0	0	0	0	0	2	94	175	38.1	91	114	66	95	2	0	98	102.5	395.2	142	3	3	97	95	98	76.5	143	5	5	98	96	99	35	141	8	8	97	66	187	130
27	0	31	0	1	0	0	0	0	0	0	0	0	0	0	0	2	133	177	42.6	127	134	86	98	2	1	99	136.5	442.5	135	6	6	98	97	99	75	135	7	7	99	98	98	43	129	6	3	98	155	185	132
28	0	37	0.04	1	1	1	1	1	0	0	0	0	0	0	0	2	152	178	47.9	132	136	82	98	4	1	99	161.3	477.5	114	6	5	99	99	98	90	116	6	5	97	100	99	40	108	5	3	99	201	167	89
29	1	27	0	0	0	0	0	0	0	0	0	0	0	0	0	4	97	164	37.6	106	137	81	79	0	0	99	164.5	482.5	115	4	5	98	81	98	67.5	113	3	5	99	80	99	40	115	2	3	98	246	247	157
30	1	39	0	0	1	0	0	0	0	0	0	0	0	1	0	2	74	154	31.2	96	138	78	85	1	1	98	239.3	697.5	120	5	6	98	85	99	77.5	125	4	6	97	86	98	44	116	4	5	97	104	174	97
31	0	19	0.08	0	0	0	0	0	0	0	0	0	0	0	0	2	110	170	38.1	111	138	78	94	2	3	98	225.5	547.8	115	3	4	98	95	99	80	117	4	3	98	95	99	47	112	4	5	98	104	174	97
32	1	32	0	0	0	0	0	0	0	0	0	0	0	0	0	2	88	160	35.2	112	111	73	87	0	0	98	151.5	449.3	133	6	7	97	88	99	81	145	6	2	97	86	99	31	134	4	2	98	108	194	121
33	1	48	0	0	0	0	0	0	0	0	0	0	0	0	0	4	87	149	39.2	92	122	78	84	0	0	99	164.3	487.5	95	5	3	99	85	98	56	92	5	3	99	85	99	31	95	3	3	99	51	204	120
34	1	32	0	0	1	0	0	0	0	0	0	0	0	0	1	3	106	167	41.9	107	143	97	105	0	0	98	161.3	488.5	129	5	5	97	104	99	105	122	8	7	98	105	98	36	127	5	7	98	199	212	125
35	1	35	0	1	0	0	0	0	0	0	0	0	0	0	0	2	88	159	39.6	110	139	90	80	0	2	98	161.8	449.5	95	5	4	98	82	99	89	98	6	8	99	81	98	30	95	5	8	98	100	164	91
36	1	34	0	0	1	0	1	0	0	0	0	0	0	0	0	2	91	165	35.9	97	137	84	83	0	0	98	181.5	535.5	119	7	7	97	84	99	62.5	117	7	4	99	82	99	28	112	5	2	99	188	260	184
37	1	54	0	0	1	0	0	1	0	0	0	0	0	0	0	1	83	158	35.5	102	126	71	83	4	5	99	136.5	452	98	8	8	99	84	98	58	100	8	8	99	85	99	18	95	5	6	99	429	253	139
38	0	32	0	1	0	0	0	0	0	0	0	0	0	0	0	2	122	175	40.2	114	148	84	75	0	0	98	180.7	562.5	105	4	4	99	75	98	91.5	109	4	5	99	74	99	43	107	3	5	99	147	232	143
39	1	36	0	0	0	0	0	0	0	0	0	0	0	0	0	2	96	160	37.5	102	142	84	90	3	0	98	158.3	459.5	121	5	5	98	92	99	59	130	7	6	99	91	98	32	125	5	3	99	132	223	143
40	1	32	0	0	0	0	0	0	0	0	0	0	0	0	0	2	97	160	37.9	95	145	89	100	2	2	99	165.5	507.3	121	5	7	98	102	99	75	120	6	7	98	103	98	40	115	4	4	98	107	190	116
41	1	28	0	0	0	0	0	0	0	0	0	0	0	0	0	3	105	160	41.2	110	134	80	81	2	2	99	178.2	568.5	105	5	4	98	83	99	72.5	103	6	5	98	82	98	37	99	4	5	99	80	174	114
42	1	34	0	0	0	0	0	0	0	0	0	0	0	0	0	2	107	165	39.3	117	130	70	91	0	1	99	138.5	446.3	121	5	5	97	92	99	80	120	5	6	97	90	99	25	115	2	2	98	59	163	87
43	1	31	0	0	0	0	0	0	0	0	0	0	0	0	0	1	96	160	37.5	102	132	87	105	1	2	97	134.5	421	137	6	5	97	106	98	75.5	136	7	7	98	104	97	27	133	9	8	96	125	183	120
44	1	35	0	1	0	0	0	0	0	0	0	0	0	0	0	2	117	159	46.3	101	135	76	86	0	0	97	163.5	452.5	130	7	6	98	90	98	72	123	7	6	99	88	98	33	125	6	5	98	80	181	128
45	1	38	0	0	0	0	0	0	0	0	0	0	0	0	0	2	98	162	37.3	101	157	110	80	4	0	98	92	260	110	7	10	98	83	97	72.5	109	6	6	98	82	99	38	108	9	5	98	139	148	88
46	1	30	0	1	0	0	0	0	0	0	0	0	0	0	0	2	97	161	37.4	103	139	93	75	2	0	98	151	424	111	8	8	99	77	98	72	120	6	4	99	76	99	31	107	8	5	98
47	1	31	0	0	0	0	0	0	0	0	0	0	0	0	0	2	120	165	44.1	127	156	91	99	0	0	99	151.6	428.3	135	6	5	98	101	98	62	137	10	7	98	100	99	32	133	9	1	99
48	0	33	0	0	0	0	0	0	0	0	0	0	0	0	0	4	83.5	165	30.3	90	117	83	82	1	0	97	163.5	509.3	105	3	3	98	84	98	73.5	108	3	2	98	83	98	35	103	4	4	97
49	0	39	0	1	1	0	0	0	0	0	0	0	0	1	0	2	121	171	41.4	122	142	96	93	3	2	97	158.5	512.3	111	7	7	97	94	98	75	110	6	8	98	94	99	22	104	6	7	98
50	0	29	0	0	0	0	0	0	0	0	0	0	0	0	0	1	141	186	41.5	122	130	80	106	3	0	96	188.3	571.5	132	5	6	96	107	95	92.5	132	7	6	97	106	96	31	130	7	7	96
51	0	26	0	1	0	0	0	0	0	0	0	0	0	0	0	2	88	171	30.1	107	131	76	100	2	2	97	123.4	425.5	135	4	2	96	102	98	69	140	4	2	97	101	98	35	144	4	4	98
52	1	46	0	1	1	1	0	0	0	0	0	0	0	0	0	1	89	158	35.7	102	152	92	79	3	4	96	134.6	422.3	92	4	4	97	80	99	46	89	3	4	98	78	97	22	88	4	5	97
53	0	43	0	1	1	1	0	0	0	0	0	0	0	1	0	2	143	170	49.5	106	136	88	103	5	5	96	147.4	412	118	6	7	97	103	98	56	116	5	7	96	104	97	22	113	6	6	95
54	1	21	0	1	1	0	0	0	0	0	0	0	0	0	1	2	114	166	41.4	112	130	66	86	1	0	98	162.3	509.7	121	3	5	98	89	98	85.5	126	6	5	97	87	98	32	123	6	5	96
55	1	26	0	0	0	0	0	0	0	0	0	0	0	0	0	2	124	160	48.4	112	135	76	84	3	0	99	161.5	437.7	106	6	6	97	85	99	52.5	107	5	5	99	85	98	24	103	5	3	99
56	1	42	0	0	1	1	1	1	0	0	0	0	0	0	1	2	98	155	40.8	117	133	70	95	2	0	99	155.4	419.5	128	5	3	99	97	98	69.5	127	6	3	99	96	98	59	123	5	3	99
57	1	24	0	0	0	0	0	0	0	0	0	0	0	0	0	2	90.8	145	43.2	97	124	78	85	3	0	99	163.5	487.5	102	7	7	99	87	99	79.5	96	7	7	99	86	98	28	95	5	3	99
58	1	29	0	0	1	0	1	0	0	0	0	0	0	0	0	4	110	167	39.4	117	146	83	70	1	1	98	184.5	692.5	124	3	4	97	72	99	85	130	4	5	99	71	99	55	122	2	3	99
59	1	34	0	0	1	1	0	0	0	0	0	0	0	0	0	2	106	158	42.5	111	137	93	78	2	2	99	221.5	588.5	120	6	5	99	79	98	80	115	6	5	98	79	98	37	121	5	4	99
[truncated: 2 more columns]

## Sheet: Coding
Sex	0 = male	1 = female
Smoking	0 = no	1 = yes
Drinking	0 = no	1 = yes
Underlying diseases	0 = no	1 = yes
HT (Hypertension)	0 = no	1 = yes
DM (Diabetes mellitus)	0 = no	1 = yes
Dyslipid (dyslipidemia)	0 = no	1 = yes
OA (osteoarthritis)	0 = no	1 = yes
CKD (Chronic kidney disease)	0 = no	1 = yes
OSA (Obstructive sleep apnea)	0 = no	1 = yes
CVD (cardiovascular disase)	0 = no	1 = yes
Fattyliver	0 = no	1 = yes
Arthritis	0 = no	1 = yes
Thyroid	0 = no	1 = yes
PA level (Physical activity level)		1 = No activity
		2 = Participated in sporting or leisure-time physical activity other than walking, jogging, or running
		3 = Walk, jog, or run up to 10 miles per week
		4 = Walk, jog, or run from 10 to 20 miles per week
